# Supplementary material for: Pyrene-Capped CdSe@ZnS Nanoparticles as Sensitive Flexible Oxygen Sensors in Non-Aqueous Media
Source: PubMed Central journal article supplement — ChemistryOpen. 2014 Sep 5;3(5):199–205. doi: 10.1002/open.201402021 (PMC4234216; doi:10.1002/open.201402021), 2014-09-05
Supplement: open0003-0199-sd1.pdf [file open0003-0199-sd1.pdf]

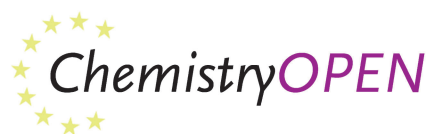

## Supporting Information

© 2014 The Authors. Published by Wiley-VCH Verlag GmbH & Co. KGaA, Weinheim

### **Pyrene-Capped CdSe@ZnS Nanoparticles as Sensitive Flexible Oxygen Sensors in Non-Aqueous Media\*\***

Soranyel González-Carrero,<sup>[a]</sup> Miguel de la Guardia,<sup>[b]</sup> Raquel E. Galian,<sup>\*[a]</sup> and Julia Pérez-Prieto<sup>\*[a]</sup>

open\_201402021\_sm\_miscellaneous\_information.pdf

| <b>Supporting information</b>                                                                                                                                                                                                                           |           |
|---------------------------------------------------------------------------------------------------------------------------------------------------------------------------------------------------------------------------------------------------------|-----------|
| <b>Figure S1.</b> Emission spectra of CS@Py at $\lambda_{exc}= 340$ nm ( $A_{340} = 0.15$ ) in hexane (a), dichlorometane (b), ethyl acetate (c), chloroform (d) and dioxane (e) in the presence of increasing $[O_2]$ .                                | <b>S2</b> |
| <b>Figure S2</b> $I_0/I$ dependence of $[O_2]$ for $M^*$ , $E^*$ and $CS^*$ of CS@Py in the solvents assayed.                                                                                                                                           | <b>S3</b> |
| <b>Figure S3</b> $\tau_0/\tau$ dependence of $[O_2]$ for $M^*$ , $E^*$ and $CS^*$ in the solvents assayed.                                                                                                                                              | <b>S4</b> |
| <b>Figure S4</b> Kinetic decay traces, and their fitting to exponential functions of time, registered at $\lambda_{exc}= 397$ nm (A), 480 nm (B) and 640 nm (C) for CS@Py in THF in the presence of increasing $[O_2]$ : a) 0 mM, b) 2 mM and c) 10 mM. | <b>S5</b> |
| <b>Figure S5</b> Change of monomer emission of deaerated CS@Py sample vs. the time under atmospheric pressure monitored for: hexane (A), dichloromethane (B), ethyl acetate (C), tetrahydrofuran (D), chloroform (E), toluene (F) and dioxane (G).      | <b>S6</b> |
| <b>Table S2.</b> Stern-Volmer quenching constant for pyrene excimer, $K_{E^*}$ , and nanoparticle, $K_{CS^*}$                                                                                                                                           | <b>S7</b> |
| <b>Figure S6.</b> Dependence of the CS@Py response ( $R$ ) under nitrogen, air, and oxygen for the different solvents                                                                                                                                   | <b>S7</b> |

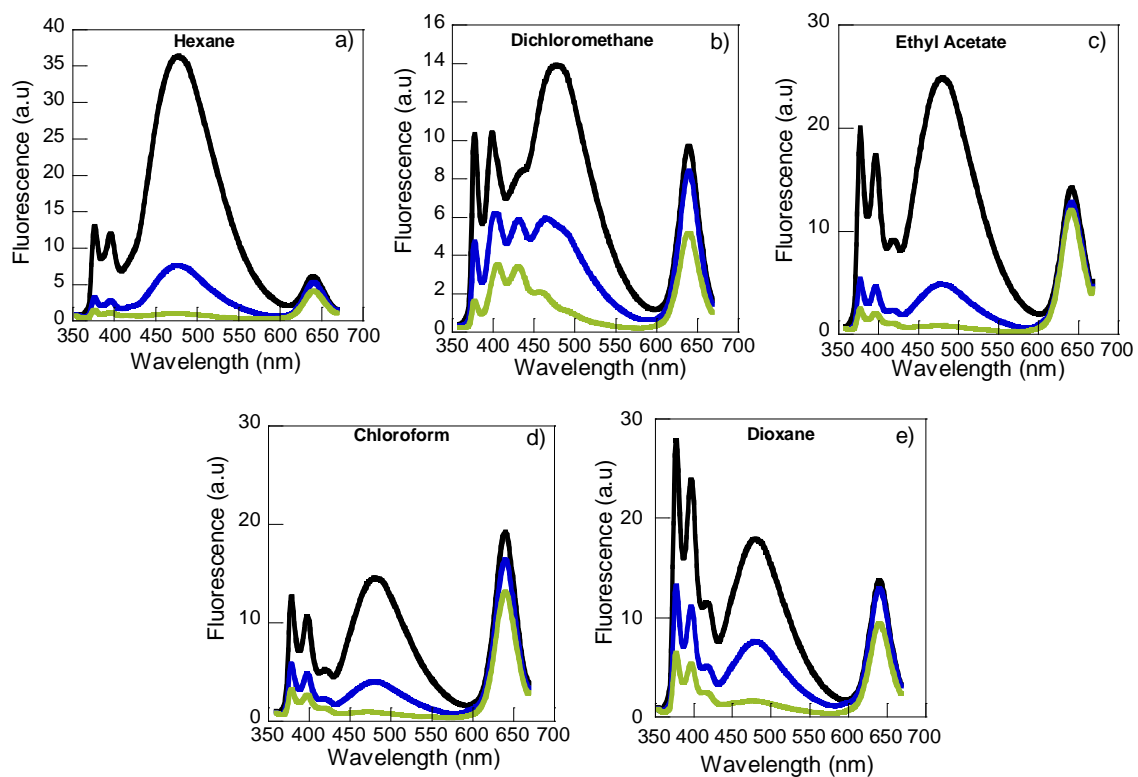

**Figure S1.** Emission spectra of CS@Py at  $\lambda_{exc} = 340$  nm ( $A_{340} = 0.15$ ) in hexane (a), dichloromethane (b), ethyl acetate (c), chloroform (d) and dioxane (e), in the presence of increasing  $[O_2]$ : the deaerated sample (black), the aerated sample (blue) and the  $O_2$  saturated sample (green).

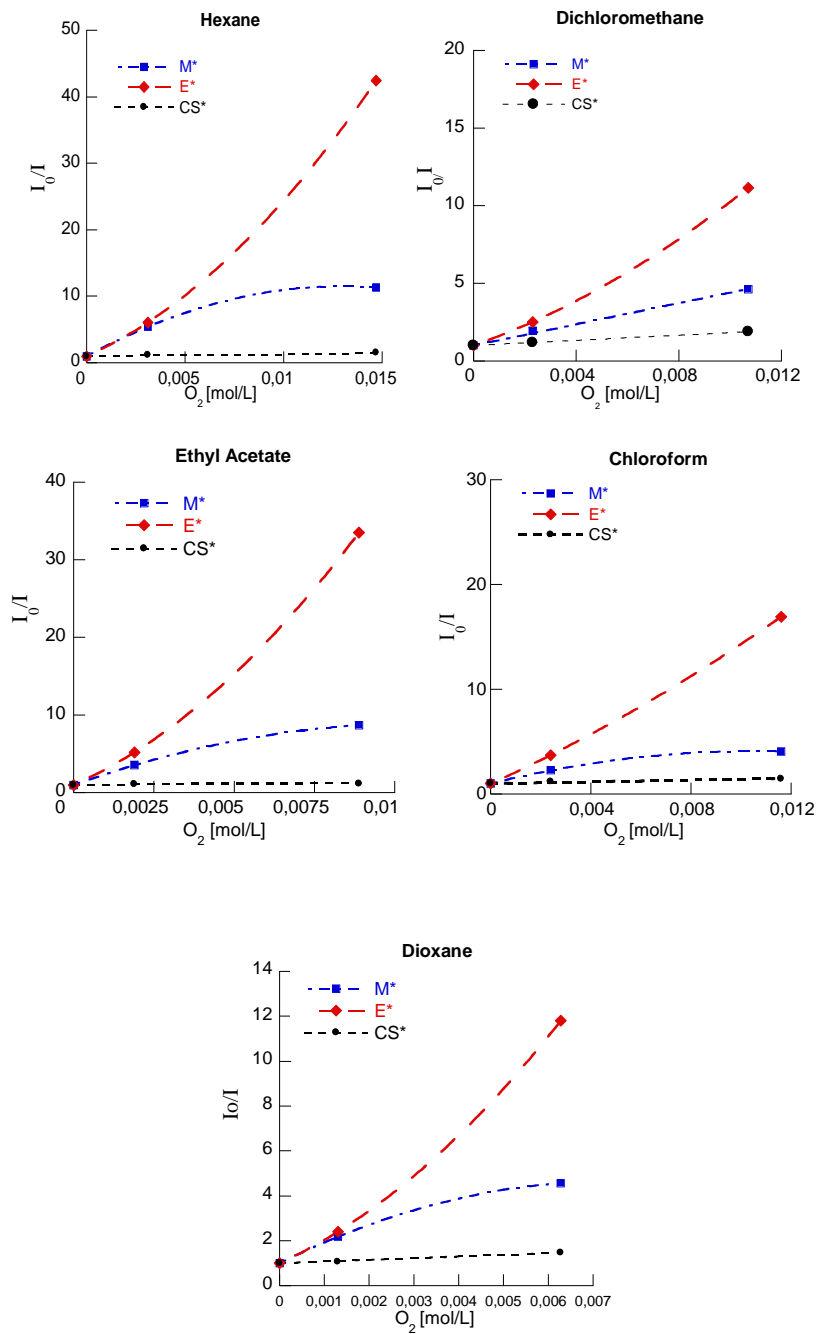

**Figure S2**  $I_0/I$  dependence of  $[O_2]$  for  $M^*$ ,  $E^*$  and  $CS^*$  of CS@Py in the solvents assayed

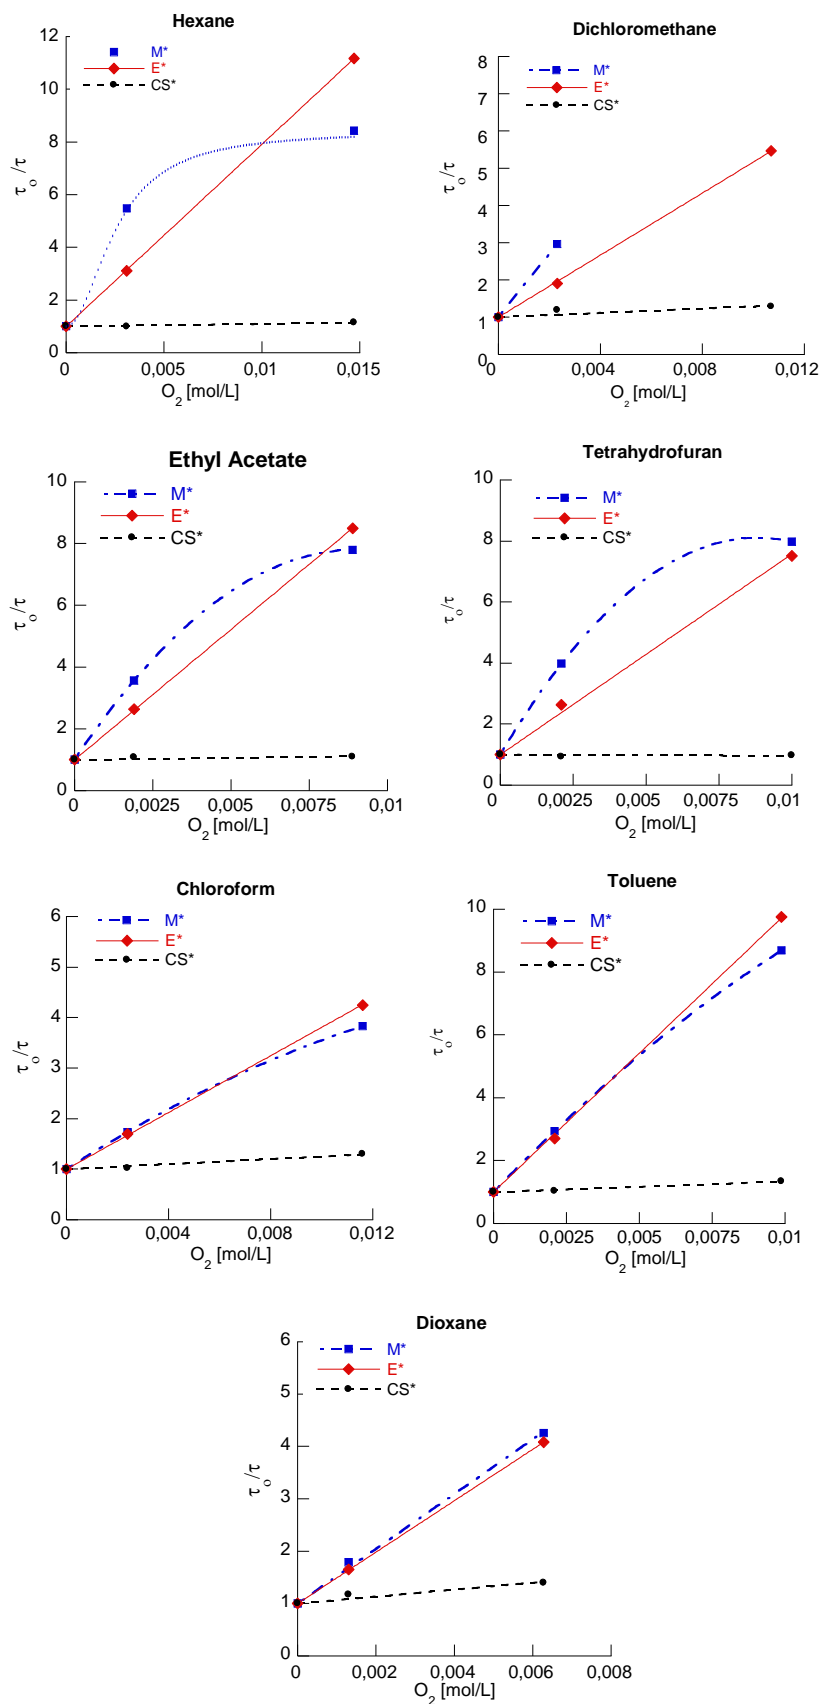

**Figure S3**  $\tau_0/\tau$  dependence of  $[O_2]$  for  $M^*$ ,  $E^*$  and  $CS^*$  in the solvents assayed

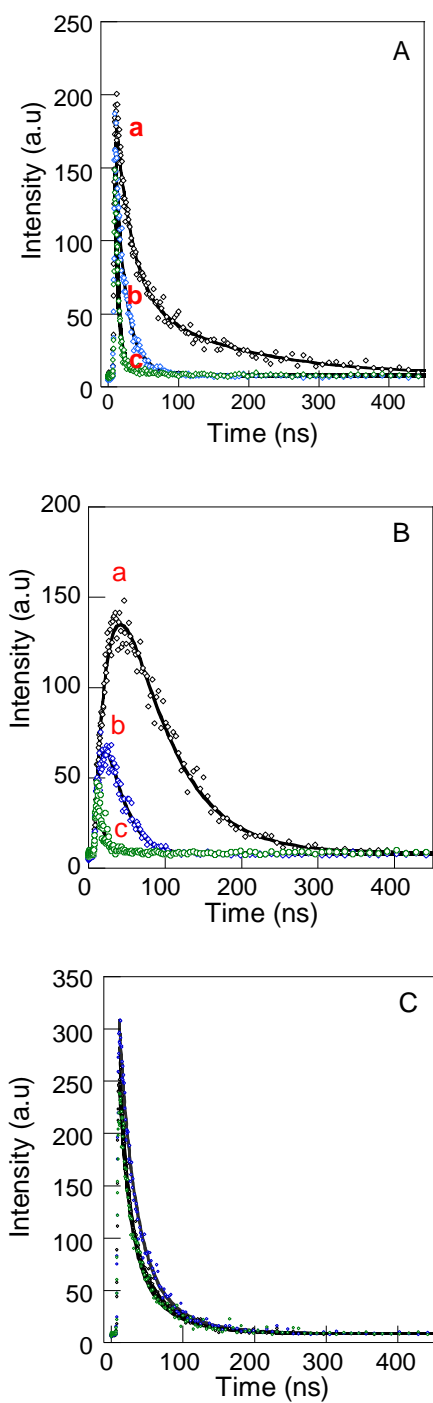

**Figure S4** Kinetic decay traces, and their fitting to exponential functions of time, registered at  $\lambda_{exc}$ = 397 nm (A), 480 nm (B) and 640 nm (C) for CS@Py in THF in the presence of increasing  $[O_2]$ : a) 0 mM, b) 2 mM and c) 10 mM.

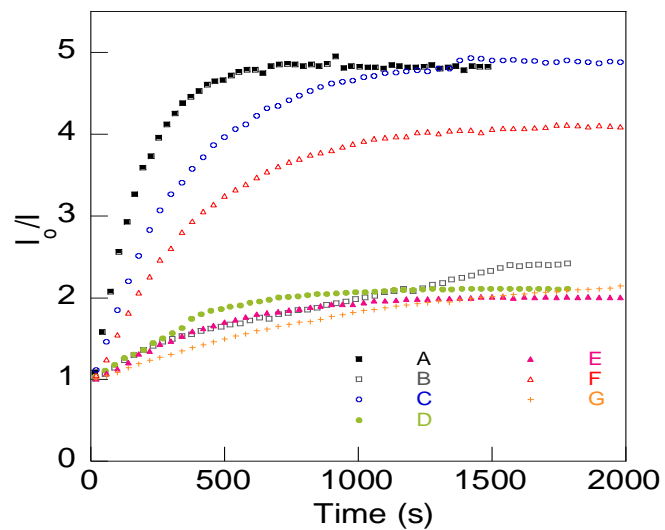

**Figure S5** Change of monomer emission of deaerated CS@Py sample vs. the time under atmospheric pressure monitored for: hexane (A), dichloromethane (B), ethyl acetate (C), tetrahydrofuran (D), chloroform (E), toluene (F) and dioxane (G).

**Table S2.** Stern-Volmer quenching constant for pyrene excimer,  $K_{E^*}$ , and nanoparticle,  $K_{CS^*}$ 

| Solvent         | $K_{E^*} (M^{-1})$ | $r^{[a]}$ | $K_{CS^*} (M^{-1})$ | $r^{[a]}$ |
|-----------------|--------------------|-----------|---------------------|-----------|
| Hexane          | $691.09 \pm 0.9$   | 0.9999    | $9.0 \pm 1.0$       | 0.9453    |
| Dichloromethane | $416.6 \pm 4$      | 0.9998    | $28.9 \pm 8.0$      | 0.7760    |
| Ethyl acetate   | $844.3 \pm 2$      | 0.9999    | $12.6 \pm 4$        | 0.6426    |
| Tetrahydrofuran | $657.3 \pm 0.1$    | 0.9986    | [b]                 | [b]       |
| Chloroform      | $280.6 \pm 2$      | 0.9999    | $25.1 \pm 2$        | 0.9848    |
| Toluene         | $883.3 \pm 11$     | 0.9997    | $33.54 \pm 1$       | 0.9870    |
| Dioxane         | $490.8 \pm 1$      | 0.9999    | $66.45 \pm 9$       | 0.9537    |

[a] Linear regression fits. [b] CS\* Lifetime does not change with the oxygen concentration in this solvent.

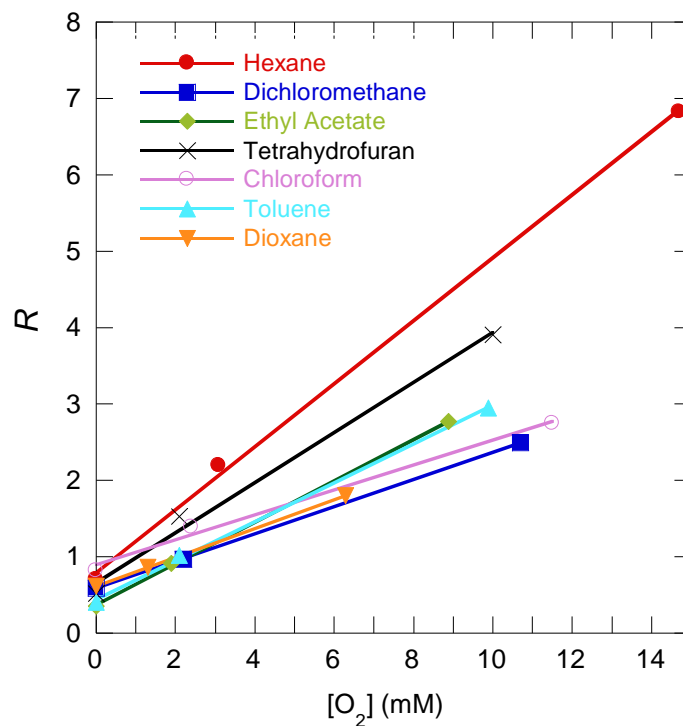**Figure S6.** Dependence of the CS@Py response ( $R$ ) under nitrogen, air, and oxygen for the different solvents
